# Supplementary material
Source: publisher site journal article supplement (https://www.dovepress.com/article/409812)
Supplement: Supplementary file 1 [file get_supplementary_file.php]

**Supplementary Table 1 Descriptive statistics of the development and validation group**

|  | Development group | Validation group | P-value |
| --- | --- | --- | --- |
| Number, n (%) | 824 (80.00) | 206 (20.00) |  |
| **Baseline characteristics** |  |  |  |
| Age, year | 59.77 (46.68, 73.59) | 60.26 (48.04, 71.61) | 0.907 |
| Height, cm | 168.00 (161.94, 175.00) | 170.00 (163.00, 177.38) | 0.073 |
| Weight, kg | 81.60 (70.00, 97.70) | 78.80 (68.21, 97.80) | 0.519 |
| Gender, n (%) |  |  |  |
| Female | 358 (43.45) | 76 (36.89) | 0.088 |
| Male | 466 (56.55) | 130 (63.11) |
| Race, n (%) |  |  |  |
| White | 511 (62.02) | 138 (66.99) | 0.186 |
| Others/Unknown | 313 (37.99) | 68 (33.01) |
| **Vital signs** |  |  |
| Heart rate, /min | 93.33 (80.52, 107.38) | 92.17 (79.5, 106.44) | 0.704 |
| Respiratory rate, /min | 20.21(17.50, 23.40) | 20.15 (17.14, 24.25) | 0.777 |
| Temperature, ℃ | 36.94 (36.67, 37.31) | 36.86 (36.59, 37.27) | 0.105 |
| SBP, mmHg | 119.93 (108.41, 135.36) | 118.75 (107.54, 135.04) | 0.627 |
| DBP, mmHg | 67.00 (58.29, 76.24) | 67.17 (59.14, 78.53) | 0.594 |
| MBP, mmHg | 80.86 (72.44, 90.74) | 80.07 ( 72.55, 92.08) | 0.661 |
| Spo2, % | 96.27 (94.91, 97.77) | 96.24 (94.67, 97.56) | 0.289 |
| **Laboratory parameters** |  |  |  |
| WBC_max, 109/L | 13.80 (9.70, 19.70) | 13.50 (10.30, 19.00) | 0.719 |
| WBC_min, 109/L | 10.50 (7.00, 15.40) | 10.50 (7.40, 15.40) | 0.743 |
| Hematocrit, % | 31.57±6.60 | 31.33±6.55 | 0.632 |
| RDW, % | 14.90 (13.90, 16.50) | 14.80 (13.80, 16.20) | 0.738 |
| RBC, 109/L | 3.43 (2.96, 3.97) | 3.43 (2.87, 3.92) | 0.740 |
| Hemoglobin, g/dL | 10.48±2.29 | 10.45±2.19 | 0.856 |
| Platelets, 109/L | 172.00 (113.00, 243.00) | 156.00 (107.00, 222.00) | 0.125 |
| ALT, Units/L | 57.09 (27.00, 151.00) | 59.00 (30.00, 167.00) | 0.291 |
| AST, Units/L | 81.18 (40.00, 185.00) | 88.00 (42.00, 211.00) | 0.422 |
| Albumin, g/dL | 3.06±0.63 | 3.01±0.62 | 0.384 |
| TBIL, mg/dL | 1.20 (0.60, 2.90) | 1.20 (0.622, 3.60) | 0.602 |
| BUN, mg/dL | 21.00 (13.00, 38.00) | 22.00 (15.00, 39.00) | 0.267 |
| Creatinine,mg/dL | 1.10 (0.80, 2.10) | 1.20 (0.80, 2.10) | 0.456 |
| Aniongap, mmHg | 17.00 (14.00, 20.00) | 17.00 (14.00, 21.00) | 0.867 |
| Bicarbonate, mmol/L | 21.00 (17.00, 23.00) | 20.00 (17.00, 24.00) | 0.925 |
| Calcium, mg/dL | 7.80 (7.10, 8.30) | 7.80 (7.10, 8.30) | 0.967 |
| Chloride, mmol/L | 102.00 (97.00, 106.00) | 101.67 (98.00, 106.00) | 0.739 |
| Sodium_min, mmol/L | 137.00 (133.00, 140.00) | 137.00 (134.00, 140.00) | 0.631 |
| Sodium_max, mmol/L | 140.00 (137.00, 143.00) | 140.00 (136.00, 143.00) | 0.947 |
| Potassium_min, mmol/L | 3.70 (3.40, 4.10) | 3.70 (3.50, 4.10) | 0.750 |
| Potassium_max, mmol/L | 4.30 (3.90, 4.90) | 4.30 (3.90, 5.00) | 0.774 |
| **Advanced life support** |  |  |  |
| Mechanical ventilation, n (%) | 267 (32.40) | 80 (38.84) | 0.081 |
| Renal replacement therapy, n (%) | 25 (3.03) | 8 (3.88) | 0.536 |
| **Accompanied diseases** |  |  |  |
| Hypertension, n (%) | 518 (62.86) | 132 (64.08) | 0.747 |
| Diabetes, n (%) | 259 (31.43) | 62 (30.10) | 0.711 |
| **Score system** |  |  |  |
| BISAP | 2.00 (2.00, 3.00) | 2.00 (2.00, 3.00) | 0.755 |
| APACHE II | 19.00 (13.00, 25.00) | 19.00 (13.00, 27.00) | 0.442 |
| **Death** | 109 (13.23) | 24 (11.65) | 0.546 |

SBP, systolic blood pressure; DBP, diastolic blood pressure; MBP, mean blood pressure; Spo2, oxyhemoglobin saturation; WBC_max, the maximum of white blood cells; WBC_min, the minimum of white blood cells; RDW, red cell distribution width; RBC, red blood cells; ALT, aminotransferase alanine; AST, aminotransferase aspartate; TBIL, total bilirubin; BUN, blood urea nitrogen; Sodium_min, the minimum of sodium; Sodium_max, the maximum of sodium; Potassium_min, the minimum of potassium; Potassium_max, the maximum of potassium; BISAP, Bedside index for severity in acute pancreatitis; APACHE II, Acute Physiology and Chronic Health Evaluation II.

**Supplementary Table 2 Univariate logistic regression analysis for variable selection in the development group**

|  | Survival | Death | P-value |
| --- | --- | --- | --- |
| Number, n (%) | 715 (86.77) | 109 (13.23) |  |
| **Baseline characteristics** |  |  |  |
| Age, year | 58.17 (45.65, 72.08) | 70.71 (57.23, 81.18) | <0.001 |
| Height, cm | 168.21 (162.07, 175.00) | 167.53(160.09, 173.00) | 0.397 |
| Weight, kg | 81.60 (70.00, 98.20) | 81.40 (68.90, 96.00) | 0.906 |
| Gender, n (%) |  |  |  |
| Female | 312 (43.64) | 46 (42.20) | 0.778 |
| Male | 403 (56.36) | 63 (57.80) |
| Race, n (%) |  |  |  |
| White | 445(62.24) | 66(60.55) | 0.735 |
| Others/Unknown | 270 (37.76) | 43 (39.45) |
| **Vital signs** |  |  |
| Heart rate, /min | 93.36 (79.79, 106.92) | 93.04 (82.70, 110.67) | 0.325 |
| Respiratory rate, /min | 19.96 (17.18, 23.01) | 22.07 (19.54, 24.84) | <0.001 |
| Temperature, ℃ | 36.96 (36.69, 37.33) | 36.76 (36.51, 37.15) | <0.001 |
| SBP, mmHg | 122.00 (110.05, 136.95) | 109.80 (101.07, 117.78) | <0.001 |
| DBP, mmHg | 67.78 (59.29, 77.39) | 58.60 (53.22, 67.00) | <0.001 |
| MBP, mmHg | 81.87 (73.60, 91.60) | 72.60 ( 67.42, 81.37) | <0.001 |
| Spo2, % | 96.33 (95.00, 97.80) | 95.77 (94.04, 97.36) | 0.004 |
| **Laboratory parameters** |  |  |  |
| WBC_max, 109/L | 13.60 (9.40, 19.30) | 16.00 (11.40, 22.20) | 0.001 |
| WBC_min, 109/L | 10.30 (6.90, 15.00) | 12.50 (7.60, 17.20) | 0.021 |
| Hematocrit, % | 31.90±6.52 | 29.44±6.78 | <0.001 |
| RDW, % | 14.80 (13.80, 16.10) | 16.20 (14.70, 18.50) | <0.001 |
| RBC, 109/L | 3.46 (3.00, 4.00) | 3.06 (2.54, 3.70) | <0.001 |
| Hemoglobin, g/dL | 10.62±2.25 | 9.54±2.33 | <0.001 |
| Platelets, 109/L | 173.00 (120.00, 243.00) | 157.00 (91.00, 248.00) | 0.056 |
| ALT, Units/L | 59.00 (27.00, 147.00) | 53.33 (29.00, 171.00) | 0.756 |
| AST, Units/L | 78.00 (39.00, 173.00) | 108.00 (46.00, 277.58) | 0.009 |
| Albumin, g/dL | 3.12±0.61 | 2.65±0.63 | <0.001 |
| TBIL, mg/dL | 1.20 (0.60, 2.80) | 2.20 (0.90, 5.90) | <0.001 |
| BUN, mg/dL | 19.00 (12.00, 34.00) | 38.00 (25.00, 61.00) | <0.001 |
| Creatinine,mg/dL | 1.10 (0.70, 1.80) | 2.00 (1.10, 3.30) | <0.001 |
| Aniongap, mmHg | 17.00 (14.00, 20.00) | 19.00 (15.00, 24.00) | <0.001 |
| Bicarbonate, mmol/L | 21.00 (17.00, 24.00) | 17.00 (13.00, 21.00) | <0.001 |
| Calcium, mg/dL | 7.80 (7.20, 8.30) | 7.60 (6.90, 8.13) | 0.029 |
| Chloride, mmol/L | 102.00 (97.00, 106.00) | 102.00 (97.00, 107.00) | 0.710 |
| Sodium_min, mmol/L | 137.00 (133.00, 140.00) | 137.00 (132.00, 141.00) | 0.591 |
| Sodium_max, mmol/L | 140.00 (137.00, 143.00) | 140.00 (136.00, 143.00) | 0.464 |
| Potassium_min, mmol/L | 3.70 (3.40, 4.10) | 4.00 (3.50, 4.30) | <0.001 |
| Potassium_max, mmol/L | 4.30 (3.90, 4.80) | 4.60 (4.10, 5.30) | <0.001 |
| **Advanced life support** |  |  |  |
| Mechanical ventilation, n (%) | 214 (29.93) | 53 (48.62) | <0.001 |
| Renal replacement therapy, n (%) | 14 (1.96) | 11 (10.09) | <0.001 |
| **Accompanied diseases** |  |  |  |
| Hypertension, n (%) | 440 (61.54) | 78 (71.56) | 0.044 |
| Diabetes, n (%) | 222 (31.05) | 37 (33.95) | 0.544 |

SBP, systolic blood pressure; DBP, diastolic blood pressure; MBP, mean blood pressure; Spo2, oxyhemoglobin saturation; WBC_max, the maximum of white blood cells; WBC_min, the minimum of white blood cells; RDW, red cell distribution width; RBC, red blood cells; ALT, aminotransferase alanine ; AST, aminotransferase aspartate; TBIL, total bilirubin; BUN, blood urea nitrogen; Sodium_min, the minimum of sodium; Sodium_max, the maximum of sodium; Potassium_min, the minimum of potassium; Potassium_max, the maximum of potassium.

**Supplementary Table 3 Summary of demographic and clinical features of external validation set from eICU-CRD**

|  | Survival | Death | P-value |
| --- | --- | --- | --- |
| Number, n (%) | 475 | 39 |  |
| **Baseline characteristics** |  |  |  |
| Age, year | 52.00 (42.00, 64.00) | 62.00 (47.00, 78.00) | 0.003 |
| Height, cm | 172.70 (165.00, 178.00) | 172.70 (165.00, 177.80) | 0.974 |
| Weight, kg | 83.20 (69.90, 99.00) | 84.80 (69.80, 1101.85) | 0.592 |
| Gender, n (%) |  |  |  |
| Female | 195 (41.05) | 17 (43.59) | 0.757 |
| Male | 280 (58.95) | 22 (56.41) |
| Race, n (%) |  |  |  |
| White | 373 (78.53) | 26 (66.67) | 0.088 |
| Others/Unknown | 102 (21.47) | 13 (33.33) |
| **Vital signs** |  |  |
| Heart rate, /min | 97.25±17.94 | 101.21±21.21 | 0.193 |
| Respiratory rate, /min | 19.88 (17.53, 23.31) | 21.11 (19.50, 26.43) | 0.010 |
| Temperature, ℃ | 36.95 (36.70, 37.26) | 36.90 (36.70, 37.34) | 0.801 |
| SBP, mmHg | 125.65±18.58 | 106.26±15.62 | <0.001 |
| DBP, mmHg | 71.64 (63.54, 80.70) | 58.28 (55.86, 65.72) | <0.001 |
| MBP, mmHg | 85.67 (75.50, 95.50) | 71.48 ( 68.22, 78.67) | <0.001 |
| Spo2, % | 96.22 (94.96, 97.50) | 95.67 (93.69, 97.54) | 0.116 |
| **Laboratory parameters** |  |  |  |
| WBC_max, 109/L | 14.40 (9.99, 19.70) | 17.80 (14.00, 24.35) | 0.006 |
| WBC_min, 109/L | 9.80 (6.50, 13.64) | 11.60 (6.90, 16.50) | 0.144 |
| Hematocrit, % | 35.86 (30.20, 40.00) | 31.20 (25.40, 36.30) | 0.001 |
| RDW, % | 14.80 (13.80, 15.90) | 15.90 (14.70, 17.50) | <0.001 |
| RBC, 109/L | 3.88±0.80 | 3.30±0.79 | <0.001 |
| Hemoglobin, g/dL | 12.00 (10.10, 13.50) | 10.10 (8.20, 12.00) | <0.001 |
| Platelets, 109/L | 168.00 (115.00, 234.00) | 164.00 (115.00, 219.00) | 0.496 |
| ALT, Units/L | 56.00 (30.00, 128.00) | 62.00 (22.00, 206.00) | 0.677 |
| AST, Units/L | 81.00 (35.00, 190.00) | 147.00 (41.00, 295.00) | 0.050 |
| Albumin, g/dL | 2.90 (2.40, 3.30) | 2.40 (1.90, 2.70) | <0.001 |
| TBIL, mg/dL | 1.10 (0.70, 2.30) | 2.00 (0.90, 6.90) | 0.009 |
| BUN, mg/dL | 19.00 (12.00, 34.00) | 35.00 (24.00, 48.00) | <0.001 |
| Creatinine,mg/dL | 1.20 (0.80, 2.06) | 2.28 (1.44, 4.25) | <0.001 |
| Aniongap, mmHg | 15.00 (11.68, 19.50) | 19.00 (14.00, 25.00) | 0.042 |
| Bicarbonate, mmol/L | 20.00 (16.00, 23.36) | 18.00 (14.00, 22.00) | 0.063 |
| Calcium, mg/dL | 7.70 (7.00, 8.20) | 7.40 (7.00, 7.90) | 0.212 |
| Chloride, mmol/L | 99.00 (94.00, 104.00) | 100.00 (95.00, 104.00) | 0.748 |
| Sodium_min, mmol/L | 135.00 (131.00, 138.00) | 136.00 (132.00, 137.00) | 0.690 |
| Sodium_max, mmol/L | 139.00 (136.00, 143.00) | 140.00 (138.00, 143.00) | 0.273 |
| Potassium_min, mmol/L | 3.60 (3.20, 4.00) | 3.70 (3.40, 4.10) | 0.071 |
| Potassium_max, mmol/L | 4.30 (4.00, 4.80) | 4.70 (4.30, 5.40) | 0.004 |
| **Advanced life support** |  |  |  |
| Mechanical ventilation, n (%) | 106 (22.32) | 28 (71.80) | <0.001 |
| Renal replacement therapy, n (%) | 35 (7.37) | 11 (28.21) | <0.001 |
| **Accompanied diseases** |  |  |  |
| Hypertension, n (%) | 230 (48.42) | 25 (64.10) | 0.060 |
| Diabetes, n (%) | 155 (32.63) | 14(35.90) | 0.676 |

SBP, systolic blood pressure; DBP, diastolic blood pressure; MBP, mean blood pressure; Spo2, oxyhemoglobin saturation; WBC_max, the maximum of white blood cells; WBC_min, the minimum of white blood cells; RDW, red cell distribution width; RBC, red blood cells; ALT, aminotransferase alanine; AST, aminotransferase aspartate; TBIL, total bilirubin; BUN, blood urea nitrogen; Sodium_min, the minimum of sodium; Sodium_max, the maximum of sodium; Potassium_min, the minimum of potassium; Potassium_max, the maximum of potassium.
